# Supplementary figures and images for: The Discovery of Potent SHP2 Inhibitors with Anti-Proliferative Activity in Breast Cancer Cell Lines
Source: MDPI journal article supplement (doi:10.3390/ijms23084468), 2022-04-18

## Supplementary Information

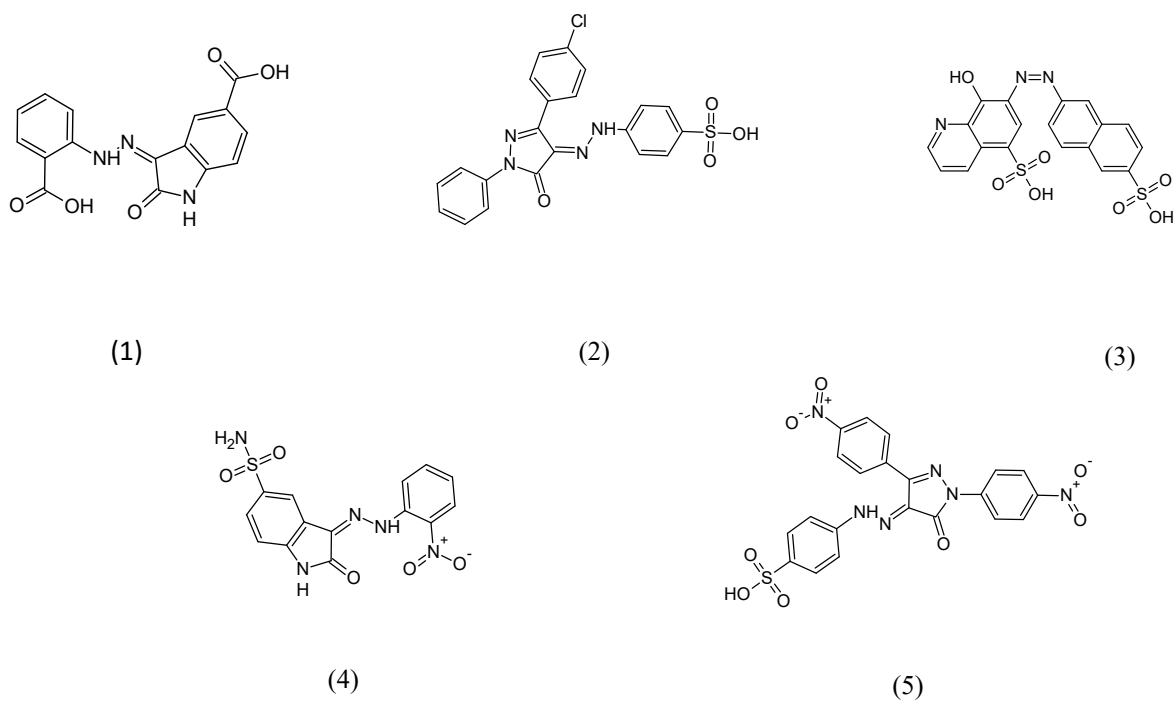

**Scheme 1.** Structure of 14a-isatin (1), PHBS\_3 (2), NSC-87877 (3), 10c-isatin (4) and PHBS\_25 (5).

Supplement: s1 [file s1]
